# Supplementary material
Source: Springer Nature journal article supplement (https://www.springermedizin.de/resource/supplementary/12936_2010_1410_MOESM2_ESM.pdf/9549734)

### Change in Mean Squared Error

-0.15      -0.1      -0.05      0      0.05      0.1      0.15

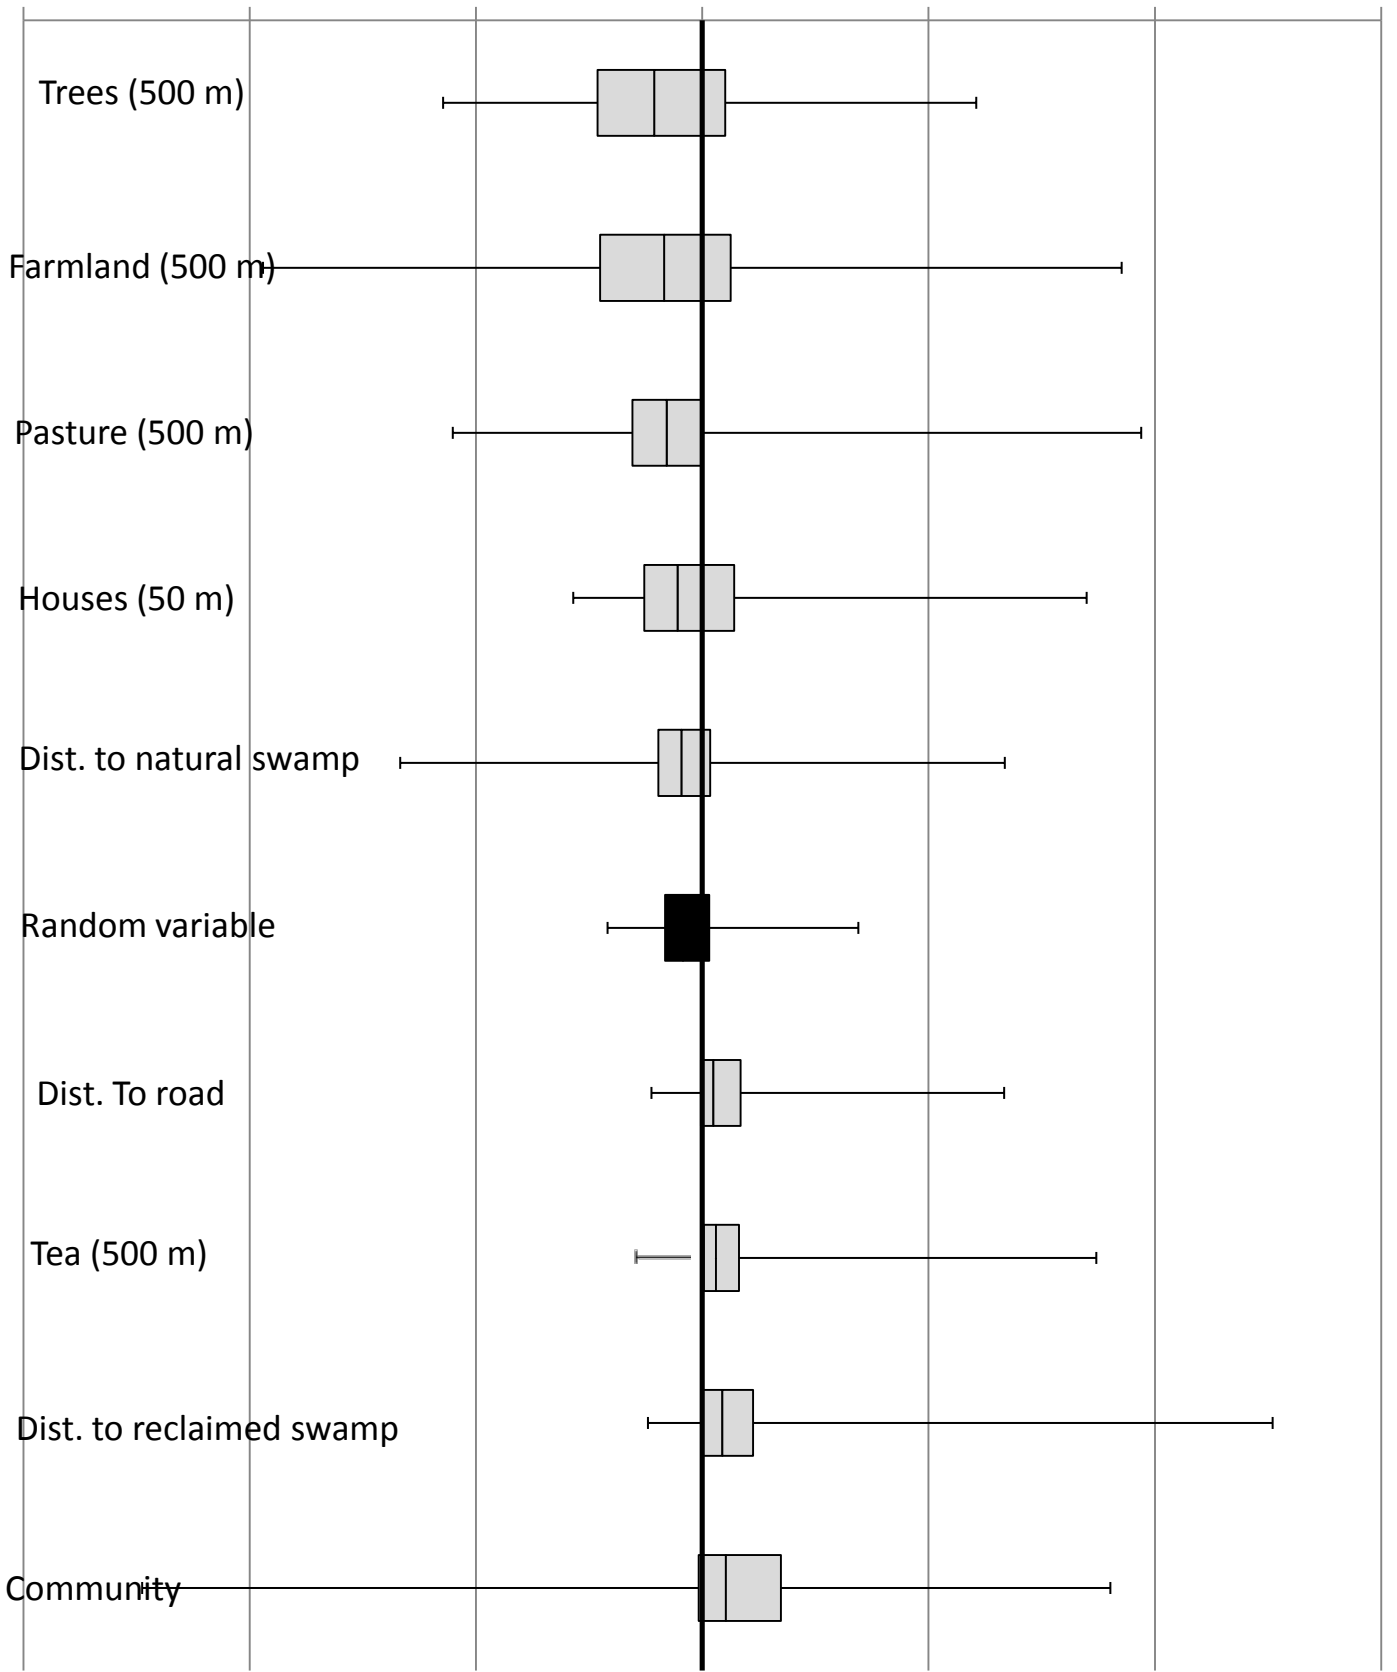

Supplement: MOESM2 [file 9549734]
